# Supplementary material for: Ultrafine Pd@PdPt nanowires with a single-atom alloy shell for efficient formate oxidation
Source: Royal Society of Chemistry journal article supplement (doi:10.1039/d2ta07647k), 2022-01-01
Supplement: d2ta07647k1.pdf [file d2ta07647k1.pdf]

## *Electronic Supplementary Information*

### **Ultrafine Pd@PdPt nanowires with a single-atom alloy shell for efficient formate oxidation**

Yu-Chuan Jiang,<sup>a</sup> Yu Ding,<sup>a</sup> Fu-Min Li,<sup>\*a</sup> Shi-Bin Yin,<sup>b</sup> Dong-Sheng Li,<sup>c</sup> Xi-Fei Li<sup>d</sup>  
and Yu Chen<sup>\*a</sup>

<sup>a</sup>*Key Laboratory of Macromolecular Science of Shaanxi Province, Key Laboratory of Applied Surface and Colloid Chemistry (Ministry of Education), Shaanxi Key Laboratory for Advanced Energy Devices, Shaanxi Engineering Lab for Advanced Energy Technology, School of Materials Science and Engineering, Shaanxi Normal University, Xi'an 710062, PR China.*

<sup>b</sup>*MOE Key Laboratory of New Processing Technology for Non-ferrous Metals and Materials, Guangxi Key Laboratory of Processing for Non-ferrous Metals and Featured Materials, Guangxi University, Nanning, Guangxi 530004, PR China.*

<sup>c</sup>*College of Materials and Chemical Engineering, Key Laboratory of Inorganic Nonmetallic Crystalline and Energy Conversion Materials, China Three Gorges University, Yichang, 443002, PR China.*

<sup>d</sup>*Key Laboratory of Advanced Batteries Materials for Electric Vehicles of China Petroleum and Chemical Industry Federation, School of Materials Science and Engineering, Xi'an University of Technology, Xi'an 710048, PR China.*

*\*Corresponding Authors*

*E-mail addresses:* lifuminxs@gmail.com (F.-M. Li), ndchenyu@gmail.com (Y. C.)

## DFT calculation

Density functional theory (DFT) calculations of Pd (111), PdPt<sub>1</sub> (111), Pt (111) and PdPt (111) surfaces were obtained by using Material studio 2019 through the local density approximation (LDA). An additional Coulomb potential ( $U_{Pt} = 3.0$  eV) and GGA+U functional was applied to states of 3d-orbit. Norm-conserving pseudopotentials were used altogether with a 400 eV of plane-wave energy cut off. The Brillouin zone was sampled with a  $2 \times 2 \times 1$  Monkhorst-Pack grid. The force on each atom of the structure was fully optimized less than  $10^{-4}$  eV/Å. A vacuum layer of 20 Å was incorporated into the slabs to avoid periodic interaction. The free energy ( $G$ ) was computed using fomula:  $G = E + \text{ZPE} - T\Delta S$ , where  $E$  was the total energy, ZPE was the zero-point energy, the entropy ( $\Delta S$ ) of each adsorbed state were carried out from DFT calculation, the thermodynamic corrections for gas molecules were obtained from standard tables.

## Figures

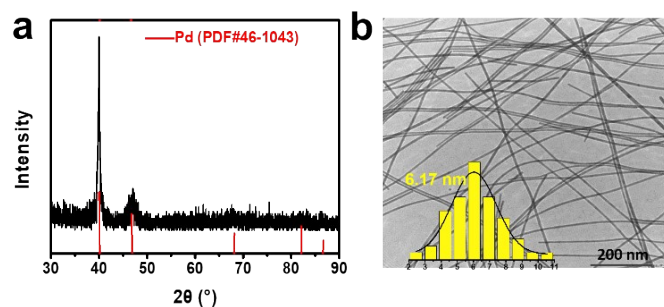

**Fig. S1** (a) XRD pattern and (b) TEM image of the as-prepared Pd NWs.

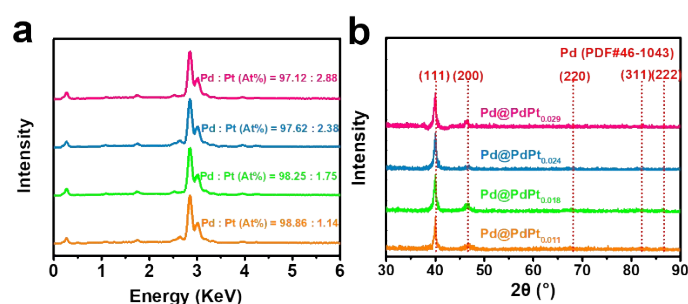

**Fig. S2** (a) EDX spectra and (b) XRD pattern of Pd@PdPt NWs.

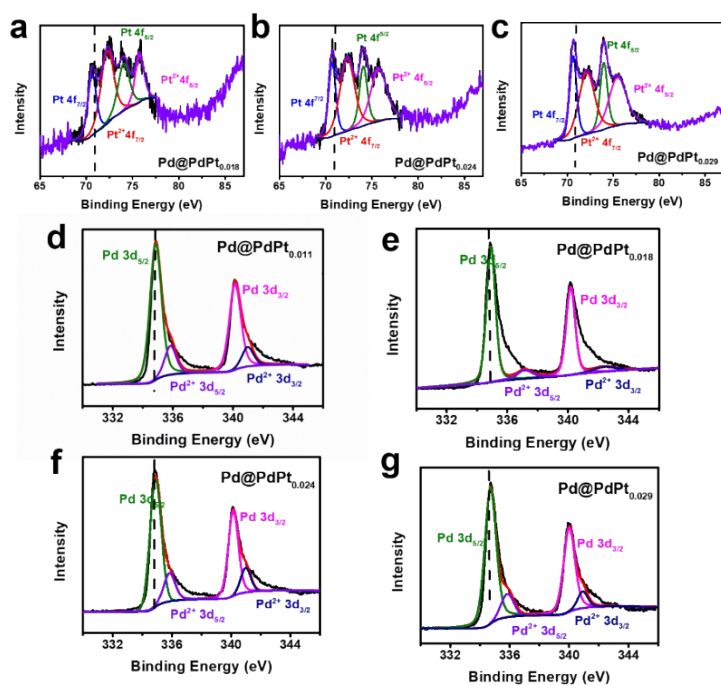

**Fig. S3** (a-c) Pt 4f and (d-g) Pd 3d XPS spectra of Pd@PdPt NWs (The black vertical dotted line indicates the standard binding energy).

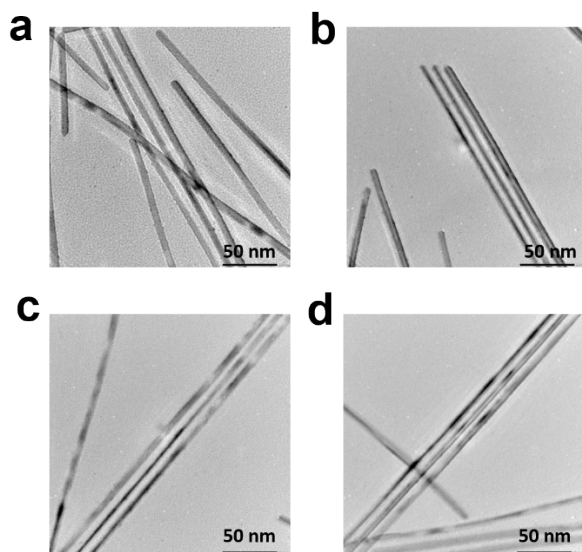

**Fig. S4** TEM images of (a) Pd@PdPt<sub>0.011</sub> NWs, (b) Pd@PdPt<sub>0.018</sub> NWs, (c) Pd@PdPt<sub>0.024</sub> NWs and (d) Pd@PdPt<sub>0.029</sub> NWs.

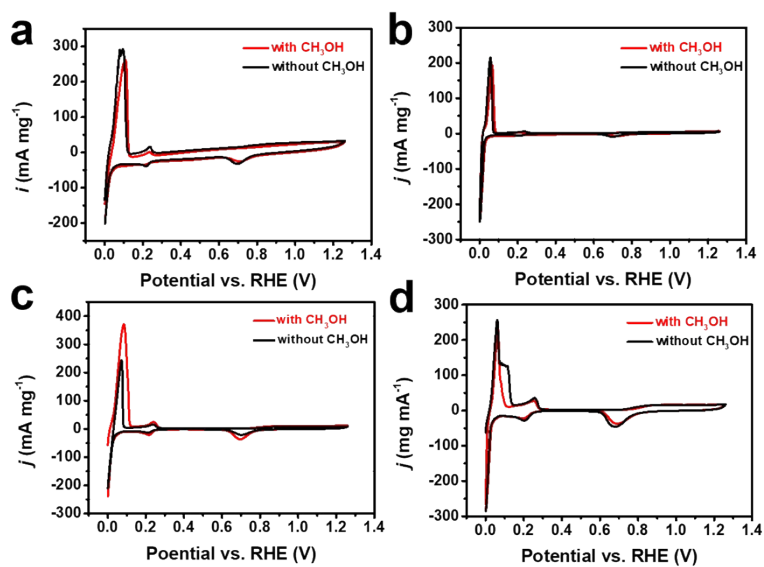

**Fig. S5** CV curves of (a) Pd@PdPt<sub>0.011</sub> NWs, (b) Pd@PdPt<sub>0.018</sub> NWs, (c) Pd@PdPt<sub>0.024</sub> NWs and (d) Pd@PdPt<sub>0.029</sub> NWs in N<sub>2</sub>-purged 1 M H<sub>2</sub>SO<sub>4</sub>/1 M H<sub>2</sub>SO<sub>4</sub> + 0.5 M CH<sub>3</sub>OH at 50 mV s<sup>-1</sup>.

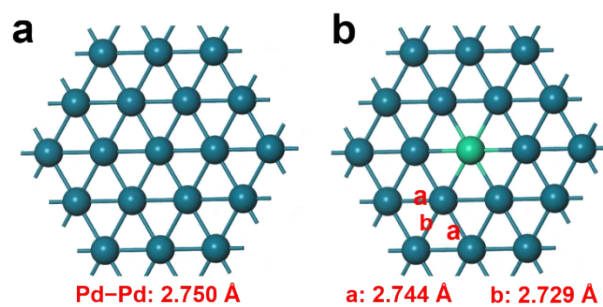

**Fig. S6** The spacing between Pd atoms on Pd (111) and PdPt<sub>1</sub> (111) surfaces.

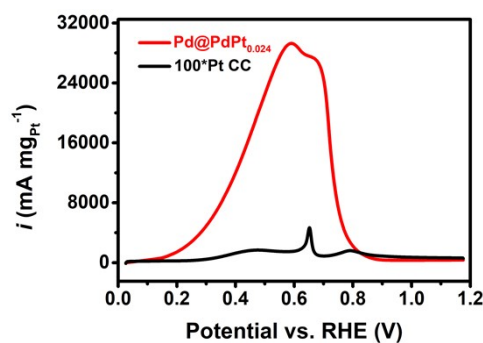

**Fig. S7** Pt mass-normalized CV curves of Pd@PdPt<sub>0.024</sub> NWs and Pt CC in N<sub>2</sub>-purged 1 M KOH + 0.5 M HCOOK at 50 mV s<sup>-1</sup>.

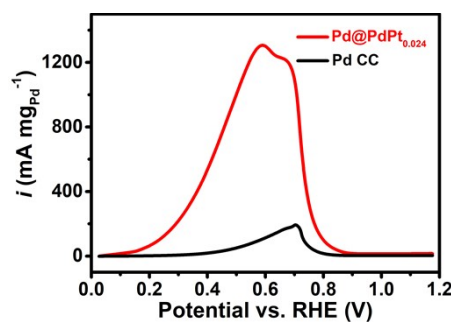

**Fig. S8** Pd mass-normalized forward CV curves of Pd@PdPt<sub>0.024</sub> NWs and Pd CC in N<sub>2</sub>-purged 1 M KOH + 0.5 M HCOOK at 50 mV s<sup>-1</sup>.

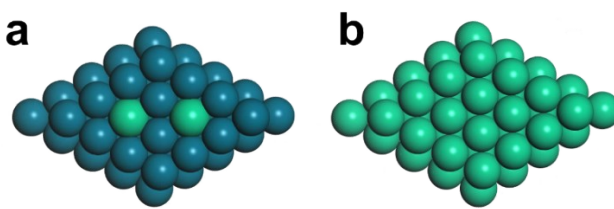

**Fig. S9** The atomic structures for (a) PdPt(111) surface and (b) Pt(111) surface.

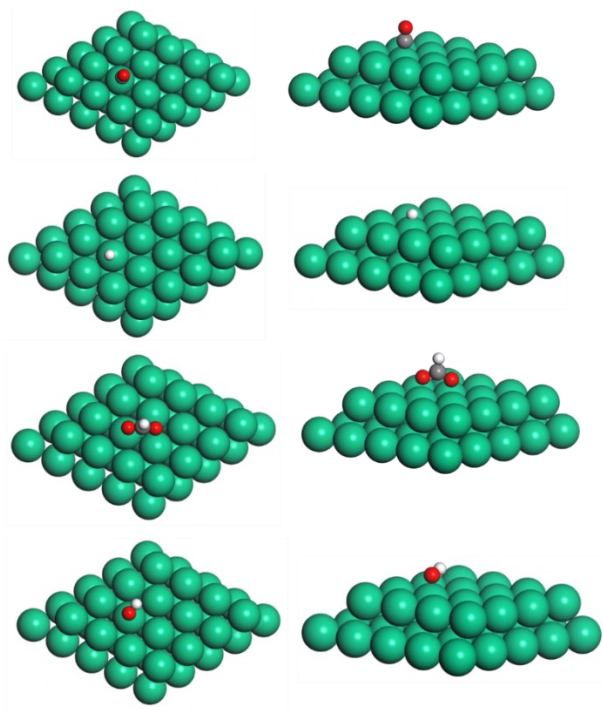

**Fig. S10** Top and side views of the atomic structures for Pt (111) alloy surfaces with adsorbed CO\*, H\*, COOH\*, OH\*. C, grey; O, red; H, white; Pt, green.

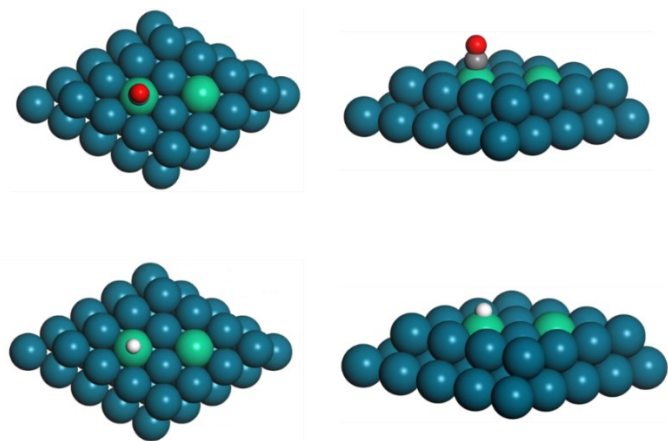

**Fig. S11** Top and side views of the atomic structures for PdPt (111) alloy surfaces with adsorbed CO\* and H\*. C, gray; O, red; H, white; Pt, green; Pd, blue.

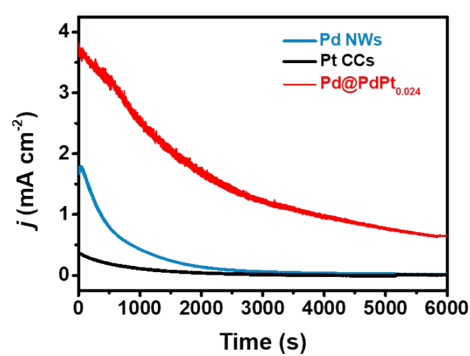

**Fig. S12** Chronoamperometric measurements of Pd@PdPt<sub>0.024</sub> NWs, Pd NWs and Pt CC in N<sub>2</sub>-purged 1 M KOH + 0.5 M HCOOK at 0.4 V.

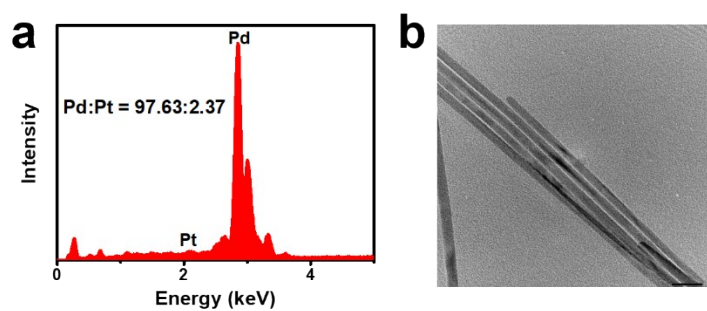

**Fig. S13** (a) EDX spectrum (b)TEM image of Pd@PdPt<sub>0.024</sub> NWs after the stability test.
